# Supplementary material for: Dual Pathways of Category-Guided Attentional Selection: Task- Relevance Modulates Hierarchical Integration of Top-Down Control and Salience
Source: Research Square preprint supplement (doi:10.21203/rs.3.rs-6888298/v1), 2025-06-20
Supplement: Supplementary file 1 [file 0f2e91b0145ad4bb80cc25aa.docx]

**Open practices statement**

Data, scripts, materials, and analyses are available at <https://osf.io/6wvqc/>
